# Supplementary material for: How often do cancer researchers make their data and code available and what factors are associated with sharing?
Source: Springer Nature journal article supplement (doi:10.1186/s12916-022-02644-2), 2022-11-09
Supplement: MOESM1 [file 23694102]

Additional File 1: Table 1. Characteristics of included studies by sharing type (N=306).

|                                          | All articles (N=306) |         | Actual data sharing            |         |                       |         | Reported data sharing          |         |                             |         |                       |         |
|------------------------------------------|----------------------|---------|--------------------------------|---------|-----------------------|---------|--------------------------------|---------|-----------------------------|---------|-----------------------|---------|
|                                          |                      |         | Data publicly available (N=49) |         | Not available (N=257) |         | Data publicly available (N=59) |         | Available on request (N=39) |         | Not available (N=208) |         |
|                                          |                      |         | N                              | (%)     | N                     | (%)     | N                              | (%)     | N                           | (%)     | N                     | (%)     |
| <b>Publisher</b>                         |                      |         |                                |         |                       |         |                                |         |                             |         |                       |         |
| Elsevier BV                              | 65                   | 21%     | 9                              | 18%     | 56                    | 22%     | 9                              | 15%     | 4                           | 10%     | 52                    | 25%     |
| Springer                                 | 62                   | 20%     | 12                             | 24%     | 50                    | 19%     | 15                             | 25%     | 12                          | 31%     | 35                    | 17%     |
| Wiley                                    | 39                   | 13%     | 2                              | 4%      | 37                    | 14%     | 2                              | 3%      | 8                           | 21%     | 29                    | 14%     |
| MDPI AG                                  | 13                   | 4%      | 6                              | 12%     | 7                     | 3%      | 6                              | 10%     | 0                           | 0%      | 7                     | 3%      |
| Informa UK Limited                       | 12                   | 4%      | 1                              | 2%      | 11                    | 4%      | 1                              | 2%      | 2                           | 5%      | 9                     | 4%      |
| Wolters Kluwer                           | 9                    | 3%      | 1                              | 2%      | 8                     | 3%      | 1                              | 2%      | 0                           | 0%      | 8                     | 4%      |
| American Association for Cancer Research | 8                    | 3%      | 2                              | 4%      | 6                     | 2%      | 2                              | 3%      | 0                           | 0%      | 6                     | 3%      |
| Frontiers Media SA                       | 7                    | 2%      | 2                              | 4%      | 5                     | 2%      | 4                              | 7%      | 2                           | 5%      | 1                     | 0%      |
| Spandidos Publications                   | 6                    | 2%      | 0                              | 0%      | 6                     | 2%      | 2                              | 3%      | 4                           | 10%     | 0                     | 0%      |
| American Chemical Society                | 5                    | 2%      | 0                              | 0%      | 5                     | 2%      | 1                              | 2%      | 0                           | 0%      | 4                     | 2%      |
| Mary Ann Liebert Inc                     | 5                    | 2%      | 1                              | 2%      | 4                     | 2%      | 1                              | 2%      | 0                           | 0%      | 4                     | 2%      |
| Oxford University Press                  | 5                    | 2%      | 2                              | 4%      | 3                     | 1%      | 2                              | 3%      | 0                           | 0%      | 3                     | 1%      |
| SAGE Publications                        | 5                    | 2%      | 2                              | 4%      | 3                     | 1%      | 2                              | 3%      | 0                           | 0%      | 3                     | 1%      |
| Other                                    | 65                   | 21%     | 9                              | 18%     | 56                    | 22%     | 11                             | 19%     | 7                           | 18%     | 47                    | 23%     |
| <b>Date published</b>                    |                      |         |                                |         |                       |         |                                |         |                             |         |                       |         |
| Q1 2019                                  | 62                   | 20%     | 9                              | 18%     | 53                    | 21%     | 11                             | 19%     | 4                           | 10%     | 47                    | 23%     |
| Q2 2019                                  | 58                   | 19%     | 10                             | 20%     | 48                    | 19%     | 11                             | 19%     | 5                           | 13%     | 42                    | 20%     |
| Q3 2019                                  | 75                   | 25%     | 11                             | 22%     | 64                    | 25%     | 14                             | 24%     | 8                           | 21%     | 53                    | 25%     |
| Q4 2019                                  | 111                  | 36%     | 19                             | 39%     | 92                    | 36%     | 23                             | 39%     | 22                          | 56%     | 66                    | 32%     |
| <b>Number of authors</b>                 |                      |         |                                |         |                       |         |                                |         |                             |         |                       |         |
| Median (IQR)                             | 8                    | 6 to 11 | 9                              | 6 to 15 | 8                     | 5 to 10 | 9                              | 6 to 14 | 8                           | 6 to 12 | 7                     | 5 to 10 |
| Mean (SD)                                | 9                    | 5       | 11                             | 6       | 8                     | 4       | 11                             | 6       | 10                          | 5       | 8                     | 4       |
| <b>Country of first author</b>           |                      |         |                                |         |                       |         |                                |         |                             |         |                       |         |
| China                                    | 96                   | 31%     | 8                              | 16%     | 88                    | 34%     | 15                             | 25%     | 17                          | 44%     | 64                    | 31%     |
| USA                                      | 61                   | 20%     | 13                             | 27%     | 48                    | 19%     | 13                             | 22%     | 5                           | 13%     | 43                    | 21%     |
| Japan                                    | 17                   | 6%      | 1                              | 2%      | 16                    | 6%      | 2                              | 3%      | 2                           | 5%      | 13                    | 6%      |
| Germany                                  | 14                   | 5%      | 4                              | 8%      | 10                    | 4%      | 4                              | 7%      | 2                           | 5%      | 8                     | 4%      |
| Italy                                    | 10                   | 3%      | 3                              | 6%      | 7                     | 3%      | 4                              | 7%      | 0                           | 0%      | 6                     | 3%      |
| Canada                                   | 9                    | 3%      | 4                              | 8%      | 5                     | 2%      | 4                              | 7%      | 1                           | 3%      | 4                     | 2%      |
| Spain                                    | 8                    | 3%      | 3                              | 6%      | 5                     | 2%      | 3                              | 5%      | 0                           | 0%      | 5                     | 2%      |
| United Kingdom                           | 8                    | 3%      | 2                              | 4%      | 6                     | 2%      | 2                              | 3%      | 2                           | 5%      | 4                     | 2%      |
| India                                    | 7                    | 2%      | 1                              | 2%      | 6                     | 2%      | 1                              | 2%      | 0                           | 0%      | 6                     | 3%      |
| Poland                                   | 7                    | 2%      | 2                              | 4%      | 5                     | 2%      | 2                              | 3%      | 0                           | 0%      | 5                     | 2%      |
| South Korea                              | 7                    | 2%      | 1                              | 2%      | 6                     | 2%      | 1                              | 2%      | 2                           | 5%      | 4                     | 2%      |
| Netherlands                              | 5                    | 2%      | 0                              | 0%      | 5                     | 2%      | 0                              | 0%      | 0                           | 0%      | 5                     | 2%      |
| Taiwan                                   | 5                    | 2%      | 1                              | 2%      | 4                     | 2%      | 1                              | 2%      | 1                           | 3%      | 3                     | 1%      |
| Australia                                | 4                    | 1%      | 0                              | 0%      | 4                     | 2%      | 0                              | 0%      | 0                           | 0%      | 4                     | 2%      |
| France                                   | 4                    | 1%      | 2                              | 4%      | 2                     | 1%      | 2                              | 3%      | 1                           | 3%      | 1                     | 0%      |
| Other country                            | 44                   | 14%     | 4                              | 8%      | 40                    | 16%     | 5                              | 8%      | 6                           | 15%     | 33                    | 16%     |
| <b>Location of first author</b>          |                      |         |                                |         |                       |         |                                |         |                             |         |                       |         |
| North America                            | 72                   | 24%     | 17                             | 35%     | 55                    | 21%     | 17                             | 29%     | 6                           | 15%     | 49                    | 24%     |
| Asia                                     | 139                  | 45%     | 14                             | 29%     | 125                   | 49%     | 22                             | 37%     | 22                          | 56%     | 95                    | 46%     |
| Europe                                   | 72                   | 24%     | 17                             | 35%     | 55                    | 21%     | 19                             | 32%     | 10                          | 26%     | 43                    | 21%     |
| North Africa/Middle East                 | 11                   | 4%      | 0                              | 0%      | 11                    | 4%      | 0                              | 0%      | 1                           | 3%      | 10                    | 5%      |
| Oceania                                  | 5                    | 2%      | 0                              | 0%      | 5                     | 2%      | 0                              | 0%      | 0                           | 0%      | 5                     | 2%      |
| South America                            | 2                    | 1%      | 0                              | 0%      | 2                     | 1%      | 0                              | 0%      | 0                           | 0%      | 2                     | 1%      |
| Central America/Caribbean                | 2                    | 1%      | 0                              | 0%      | 2                     | 1%      | 0                              | 0%      | 0                           | 0%      | 2                     | 1%      |
| Sub-Saharan Africa                       | 3                    | 1%      | 1                              | 2%      | 2                     | 1%      | 1                              | 2%      | 0                           | 0%      | 2                     | 1%      |

Additional File 1: Table 1. Characteristics of included studies by sharing type (N=306).

|                                               | All articles (N=306) |            | Actual data sharing            |            |                       |            | Data sharing                   |            |                             |            |                       |            |
|-----------------------------------------------|----------------------|------------|--------------------------------|------------|-----------------------|------------|--------------------------------|------------|-----------------------------|------------|-----------------------|------------|
|                                               |                      |            | Data publicly available (N=49) |            | Not available (N=257) |            | Data publicly available (N=59) |            | Available on request (N=39) |            | Not available (N=208) |            |
|                                               | N                    | (%)        | N                              | (%)        | N                     | (%)        | N                              | (%)        | N                           | (%)        | N                     | (%)        |
| <b>2018 Journal Impact Factor</b>             |                      |            |                                |            |                       |            |                                |            |                             |            |                       |            |
| Median (IQR)                                  | 3.3                  | 2.2 to 5.1 | 4.5                            | 2.8 to 6.7 | 3.2                   | 2.1 to 4.7 | 4.3                            | 2.8 to 6.7 | 3.1                         | 2.6 to 4.8 | 3.2                   | 2.0 to 4.7 |
| No impact factor                              | 27                   | 9%         | 4                              | 8%         | 23                    | 9%         | 6                              | 10%        | 2                           | 5%         | 19                    | 9%         |
| 0-5                                           | 200                  | 65%        | 22                             | 45%        | 178                   | 69%        | 27                             | 46%        | 28                          | 72%        | 145                   | 70%        |
| 5-10                                          | 63                   | 21%        | 16                             | 33%        | 47                    | 18%        | 18                             | 31%        | 7                           | 18%        | 38                    | 18%        |
| 10+                                           | 16                   | 5%         | 7                              | 14%        | 9                     | 4%         | 8                              | 14%        | 2                           | 5%         | 6                     | 3%         |
| <b>Open access</b>                            |                      |            |                                |            |                       |            |                                |            |                             |            |                       |            |
| Closed                                        | 155                  | 51%        | 17                             | 35%        | 138                   | 54%        | 19                             | 32%        | 12                          | 31%        | 124                   | 60%        |
| Green                                         | 14                   | 5%         | 6                              | 12%        | 8                     | 3%         | 6                              | 10%        | 0                           | 0%         | 8                     | 4%         |
| Hybrid                                        | 21                   | 7%         | 3                              | 6%         | 18                    | 7%         | 4                              | 7%         | 4                           | 10%        | 13                    | 6%         |
| Bronze                                        | 21                   | 7%         | 3                              | 6%         | 18                    | 7%         | 3                              | 5%         | 2                           | 5%         | 16                    | 8%         |
| Gold                                          | 95                   | 31%        | 20                             | 41%        | 75                    | 29%        | 27                             | 46%        | 21                          | 54%        | 47                    | 23%        |
| <b>Open access</b>                            |                      |            |                                |            |                       |            |                                |            |                             |            |                       |            |
| Yes                                           | 151                  | 49%        | 32                             | 65%        | 119                   | 46%        | 40                             | 68%        | 27                          | 69%        | 84                    | 40%        |
| No                                            | 155                  | 51%        | 17                             | 35%        | 138                   | 54%        | 19                             | 32%        | 12                          | 31%        | 124                   | 60%        |
| <b>Citations accrued (Year 1)</b>             |                      |            |                                |            |                       |            |                                |            |                             |            |                       |            |
| Mean (SD)                                     | 3                    | 7          | 7                              | 15         | 3                     | 4          | 7                              | 15         | 3                           | 4          | 2                     | 3          |
| Median (IQR)                                  | 2                    | 0 to 4     | 3                              | 1 to 5     | 2                     | 0 to 3     | 3                              | 1 to 6     | 2                           | 1 to 4     | 2                     | 0 to 3     |
| <b>Citations accrued (Year 2)</b>             |                      |            |                                |            |                       |            |                                |            |                             |            |                       |            |
| Mean (SD)                                     | 6                    | 13         | 13                             | 26         | 5                     | 8          | 13                             | 25         | 7                           | 7          | 4                     | 6          |
| Median (IQR)                                  | 3                    | 1 to 7     | 6                              | 3 to 11    | 3                     | 1 to 6     | 6                              | 3 to 12    | 4                           | 1 to 12    | 3                     | 1 to 5     |
| <b>Journal data sharing policy</b>            |                      |            |                                |            |                       |            |                                |            |                             |            |                       |            |
| No policy                                     | 67                   | 22%        | 6                              | 12%        | 61                    | 24%        | 7                              | 12%        | 3                           | 8%         | 57                    | 27%        |
| Encourage                                     | 147                  | 48%        | 14                             | 29%        | 133                   | 52%        | 18                             | 31%        | 22                          | 56%        | 107                   | 51%        |
| Share on request                              | 4                    | 1%         | 0                              | 0%         | 4                     | 2%         | 0                              | 0%         | 1                           | 3%         | 3                     | 1%         |
| Some mandatory                                | 59                   | 19%        | 15                             | 31%        | 44                    | 17%        | 20                             | 34%        | 11                          | 28%        | 28                    | 13%        |
| All mandatory                                 | 29                   | 9%         | 14                             | 29%        | 15                    | 6%         | 14                             | 24%        | 2                           | 5%         | 13                    | 6%         |
| <b>Journal DAS policy</b>                     |                      |            |                                |            |                       |            |                                |            |                             |            |                       |            |
| No policy                                     | 239                  | 78%        | 31                             | 63%        | 208                   | 81%        | 35                             | 59%        | 17                          | 44%        | 187                   | 90%        |
| Required for trials only                      | 18                   | 6%         | 4                              | 8%         | 14                    | 5%         | 4                              | 7%         | 1                           | 3%         | 13                    | 6%         |
| Required for all articles                     | 49                   | 16%        | 14                             | 29%        | 35                    | 14%        | 20                             | 34%        | 21                          | 54%        | 8                     | 4%         |
| <b>Journal code sharing policy</b>            |                      |            |                                |            |                       |            |                                |            |                             |            |                       |            |
| No policy                                     | 202                  | 66%        | 24                             | 49%        | 178                   | 69%        | 31                             | 53%        | 29                          | 74%        | 142                   | 68%        |
| Encourage                                     | 88                   | 29%        | 15                             | 31%        | 73                    | 28%        | 18                             | 31%        | 7                           | 18%        | 63                    | 30%        |
| Share on request                              | 6                    | 2%         | 4                              | 8%         | 2                     | 1%         | 4                              | 7%         | 0                           | 0%         | 2                     | 1%         |
| Some mandatory                                | 3                    | 1%         | 0                              | 0%         | 3                     | 1%         | 0                              | 0%         | 2                           | 5%         | 1                     | 0%         |
| All mandatory                                 | 7                    | 2%         | 6                              | 12%        | 1                     | 0%         | 6                              | 10%        | 1                           | 3%         | 0                     | 0%         |
| <b>Research area (CSO classification)*</b>    |                      |            |                                |            |                       |            |                                |            |                             |            |                       |            |
| Biology                                       | 69                   | 23%        | 22                             | 45%        | 47                    | 18%        | 26                             | 44%        | 9                           | 23%        | 34                    | 16%        |
| Aetiology                                     | 20                   | 7%         | 6                              | 12%        | 14                    | 5%         | 6                              | 10%        | 2                           | 5%         | 12                    | 6%         |
| Prevention                                    | 4                    | 1%         | 1                              | 2%         | 3                     | 1%         | 1                              | 2%         | 0                           | 0%         | 3                     | 1%         |
| Detection, diagnosis & prognosis              | 92                   | 30%        | 16                             | 33%        | 76                    | 30%        | 18                             | 31%        | 11                          | 28%        | 63                    | 30%        |
| Treatment                                     | 112                  | 37%        | 14                             | 29%        | 98                    | 38%        | 20                             | 34%        | 20                          | 51%        | 72                    | 35%        |
| Control, survivorship & outcomes              | 51                   | 17%        | 2                              | 4%         | 49                    | 19%        | 2                              | 3%         | 6                           | 15%        | 43                    | 21%        |
| <b>Study population*</b>                      |                      |            |                                |            |                       |            |                                |            |                             |            |                       |            |
| Human subjects                                | 177                  | 48%        | 24                             | 49%        | 153                   | 60%        | 27                             | 46%        | 21                          | 54%        | 129                   | 62%        |
| Human cells                                   | 111                  | 36%        | 26                             | 53%        | 85                    | 33%        | 29                             | 49%        | 20                          | 51%        | 62                    | 30%        |
| Animal analogues                              | 66                   | 22%        | 15                             | 31%        | 51                    | 20%        | 21                             | 36%        | 10                          | 26%        | 35                    | 17%        |
| Animal cells                                  | 65                   | 21%        | 15                             | 31%        | 50                    | 19%        | 21                             | 36%        | 10                          | 26%        | 34                    | 16%        |
| Commercial cell lines                         | 116                  | 38%        | 21                             | 43%        | 95                    | 37%        | 29                             | 49%        | 16                          | 41%        | 71                    | 34%        |
| Other (e.g. simulated data, bacteria)         | 3                    | 10%        | 0                              | 0%         | 3                     | 1%         | 0                              | 0%         | 1                           | 3%         | 2                     | 1%         |
| <b>Collected data from human participants</b> |                      |            |                                |            |                       |            |                                |            |                             |            |                       |            |
| Yes                                           | 225                  | 74%        | 38                             | 78%        | 187                   | 73%        | 43                             | 73%        | 29                          | 74%        | 153                   | 74%        |
| No                                            | 81                   | 26%        | 11                             | 22%        | 70                    | 27%        | 16                             | 27%        | 10                          | 26%        | 55                    | 26%        |

\*Percentages do not add up to 100% due to multiple answers being possible

Additional File 1: Table 1. Characteristics of included studies by sharing type (N=306).

|                                            | All articles (N=306) |     | Actual data sharing            |     |                       |     | Data sharing                   |     |                             |     |                       |      |
|--------------------------------------------|----------------------|-----|--------------------------------|-----|-----------------------|-----|--------------------------------|-----|-----------------------------|-----|-----------------------|------|
|                                            |                      |     | Data publicly available (N=49) |     | Not available (N=257) |     | Data publicly available (N=59) |     | Available on request (N=39) |     | Not available (N=208) |      |
|                                            | N                    | (%) | N                              | (%) | N                     | (%) | N                              | (%) | N                           | (%) | N                     | (%)  |
| <b>Cancer studied</b>                      |                      |     |                                |     |                       |     |                                |     |                             |     |                       |      |
| Breast cancer                              | 33                   | 11% | 6                              | 12% | 27                    | 11% | 7                              | 12% | 4                           | 10% | 22                    | 11%  |
| Bowel cancer                               | 25                   | 8%  | 3                              | 6%  | 22                    | 9%  | 3                              | 5%  | 4                           | 10% | 18                    | 9%   |
| Lung cancer                                | 24                   | 8%  | 5                              | 10% | 19                    | 7%  | 8                              | 14% | 4                           | 10% | 12                    | 6%   |
| Brain cancer                               | 23                   | 8%  | 6                              | 12% | 17                    | 7%  | 6                              | 10% | 3                           | 8%  | 14                    | 7%   |
| Liver cancer                               | 22                   | 7%  | 3                              | 6%  | 19                    | 7%  | 4                              | 7%  | 4                           | 10% | 14                    | 7%   |
| Leukaemia                                  | 14                   | 5%  | 7                              | 14% | 7                     | 3%  | 7                              | 12% | 1                           | 3%  | 6                     | 3%   |
| Prostate cancer                            | 11                   | 4%  | 1                              | 2%  | 10                    | 4%  | 1                              | 2%  | 0                           | 0%  | 10                    | 5%   |
| Stomach and oesophageal cancer             | 10                   | 3%  | 1                              | 2%  | 9                     | 4%  | 1                              | 2%  | 3                           | 8%  | 6                     | 3%   |
| Head and neck cancer                       | 9                    | 3%  | 1                              | 2%  | 8                     | 3%  | 1                              | 2%  | 1                           | 3%  | 7                     | 3%   |
| Lymphoma                                   | 9                    | 3%  | 2                              | 4%  | 7                     | 3%  | 3                              | 5%  | 1                           | 3%  | 5                     | 2%   |
| Pancreatic cancer                          | 9                    | 3%  | 1                              | 2%  | 8                     | 3%  | 1                              | 2%  | 2                           | 5%  | 6                     | 3%   |
| Cholangiocarcinoma                         | 7                    | 2%  | 1                              | 2%  | 6                     | 2%  | 1                              | 2%  | 2                           | 5%  | 4                     | 2%   |
| Thyroid cancer                             | 7                    | 2%  | 2                              | 4%  | 5                     | 2%  | 2                              | 3%  | 1                           | 3%  | 4                     | 2%   |
| Multiple cancers                           | 48                   | 16% | 6                              | 12% | 42                    | 16% | 7                              | 12% | 3                           | 8%  | 38                    | 18%  |
| Other                                      | 55                   | 18% | 4                              | 8%  | 51                    | 20% | 7                              | 12% | 6                           | 15% | 42                    | 20%  |
| <b>Cancer rarity</b>                       |                      |     |                                |     |                       |     |                                |     |                             |     |                       |      |
| Common                                     | 150                  | 49% | 18                             | 37% | 132                   | 51% | 24                             | 41% | 19                          | 49% | 107                   | 51%  |
| Mixed                                      | 28                   | 9%  | 5                              | 10% | 23                    | 9%  | 6                              | 10% | 2                           | 5%  | 20                    | 10%  |
| Rare                                       | 118                  | 39% | 26                             | 53% | 92                    | 36% | 28                             | 47% | 17                          | 44% | 73                    | 35%  |
| Other                                      | 10                   | 3%  | 0                              | 0%  | 10                    | 4%  | 1                              | 2%  | 1                           | 3%  | 8                     | 4%   |
| <b>Clinical trial</b>                      |                      |     |                                |     |                       |     |                                |     |                             |     |                       |      |
| Yes (Phase III)                            | 4                    | 1%  | 1                              | 2%  | 3                     | 1%  | 1                              | 2%  | 1                           | 3%  | 2                     | 1%   |
| Yes (Other phase)                          | 11                   | 4%  | 0                              | 0%  | 11                    | 4%  | 1                              | 2%  | 1                           | 3%  | 9                     | 4%   |
| No                                         | 291                  | 95% | 48                             | 98% | 243                   | 95% | 57                             | 97% | 37                          | 95% | 197                   | 95%  |
| <b>Inferential statistics used</b>         |                      |     |                                |     |                       |     |                                |     |                             |     |                       |      |
| Yes                                        | 274                  | 90% | 45                             | 92% | 229                   | 89% | 54                             | 92% | 36                          | 92% | 184                   | 88%  |
| No                                         | 32                   | 10% | 4                              | 8%  | 28                    | 11% | 5                              | 8%  | 3                           | 8%  | 24                    | 12%  |
| <b>Sample size calculation performed</b>   |                      |     |                                |     |                       |     |                                |     |                             |     |                       |      |
| Yes                                        | 19                   | 6%  | 4                              | 8%  | 15                    | 6%  | 5                              | 8%  | 5                           | 13% | 9                     | 4%   |
| No                                         | 255                  | 83% | 41                             | 84% | 214                   | 83% | 49                             | 83% | 31                          | 79% | 175                   | 84%  |
| Not applicable                             | 32                   | 10% | 4                              | 8%  | 28                    | 11% | 5                              | 8%  | 3                           | 8%  | 24                    | 12%  |
| <b>Used publicly available data</b>        |                      |     |                                |     |                       |     |                                |     |                             |     |                       |      |
| Yes (Exclusively)                          | 31                   | 10% | 6                              | 12% | 25                    | 10% | 7                              | 12% | 2                           | 5%  | 22                    | 11%  |
| Yes (Partially)                            | 57                   | 19% | 22                             | 45% | 35                    | 14% | 24                             | 41% | 8                           | 21% | 25                    | 12%  |
| No                                         | 218                  | 71% | 21                             | 43% | 197                   | 77% | 28                             | 47% | 29                          | 74% | 161                   | 77%  |
| <b>Subjected to a mandatory DAS policy</b> |                      |     |                                |     |                       |     |                                |     |                             |     |                       |      |
| Yes                                        | 51                   | 17% | 14                             | 29% | 37                    | 14% | 20                             | 34% | 22                          | 56% | 9                     | 4%   |
| No                                         | 255                  | 83% | 35                             | 71% | 220                   | 86% | 39                             | 66% | 17                          | 44% | 199                   | 96%  |
| <b>Conformed with mandatory DAS policy</b> |                      |     |                                |     |                       |     |                                |     |                             |     |                       |      |
| Yes                                        | 45                   | 88% | 13                             | 93% | 32                    | 86% | 19                             | 95% | 4                           | 44% | 22                    | 100% |
| No                                         | 6                    | 12% | 1                              | 7%  | 5                     | 14% | 1                              | 5%  | 5                           | 56% | 0                     | 0%   |
| <b>Availability statement present</b>      |                      |     |                                |     |                       |     |                                |     |                             |     |                       |      |
| Data only                                  | 58                   | 19% | 11                             | 22% | 47                    | 18% | 20                             | 34% | 33                          | 85% | 5                     | 2%   |
| Code only                                  | 1                    | 0%  | 0                              | 0%  | 1                     | 0%  | 0                              | 0%  | 0                           | 0%  | 1                     | 0%   |
| Data and code                              | 7                    | 2%  | 7                              | 14% | 0                     | 0%  | 7                              | 12% | 0                           | 0%  | 0                     | 0%   |
| No statement                               | 240                  | 78% | 31                             | 63% | 209                   | 81% | 32                             | 54% | 6                           | 15% | 202                   | 97%  |
| <b>Statistical analysis software used*</b> |                      |     |                                |     |                       |     |                                |     |                             |     |                       |      |
| SPSS                                       | 92                   | 30% | 8                              | 16% | 84                    | 33% | 13                             | 22% | 13                          | 33% | 66                    | 32%  |
| GraphPad                                   | 58                   | 19% | 15                             | 31% | 43                    | 17% | 17                             | 29% | 8                           | 21% | 33                    | 16%  |
| R                                          | 37                   | 12% | 15                             | 31% | 22                    | 9%  | 16                             | 27% | 2                           | 5%  | 19                    | 9%   |
| SAS                                        | 19                   | 6%  | 3                              | 6%  | 16                    | 6%  | 3                              | 5%  | 3                           | 8%  | 13                    | 6%   |
| Stata                                      | 12                   | 4%  | 1                              | 2%  | 11                    | 4%  | 1                              | 2%  | 1                           | 3%  | 10                    | 5%   |
| JMP                                        | 5                    | 2%  | 1                              | 2%  | 4                     | 2%  | 1                              | 2%  | 0                           | 0%  | 4                     | 2%   |
| MedCalc                                    | 5                    | 2%  | 1                              | 2%  | 4                     | 2%  | 1                              | 2%  | 0                           | 0%  | 4                     | 2%   |
| Microsoft Excel                            | 5                    | 2%  | 1                              | 2%  | 4                     | 2%  | 1                              | 2%  | 1                           | 3%  | 3                     | 1%   |
| Python                                     | 4                    | 1%  | 2                              | 4%  | 2                     | 1%  | 2                              | 3%  | 0                           | 0%  | 2                     | 1%   |
| Other software                             | 12                   | 4%  | 4                              | 8%  | 8                     | 3%  | 4                              | 7%  | 0                           | 0%  | 8                     | 4%   |
| Not reported                               | 70                   | 23% | 9                              | 18% | 61                    | 24% | 8                              | 14% | 10                          | 26% | 55                    | 26%  |
| Not applicable                             | 32                   | 10% | 4                              | 8%  | 28                    | 11% | 5                              | 8%  | 3                           | 8%  | 24                    | 12%  |

\*Percentages do not add up to 100% due to multiple answers being possible
